# Supplementary material for: Epidemiology and Antifungal Susceptibility Patterns of Invasive Fungal Infections (IFIs) in India: A Prospective Observational Study
Source: MDPI journal article supplement (doi:10.3390/jof8010033), 2021-12-30
Supplement: s1 [file s1]

Supplementary Figure S1: Fungal species distribution in samples from IFI cases ( $n = 253$ )

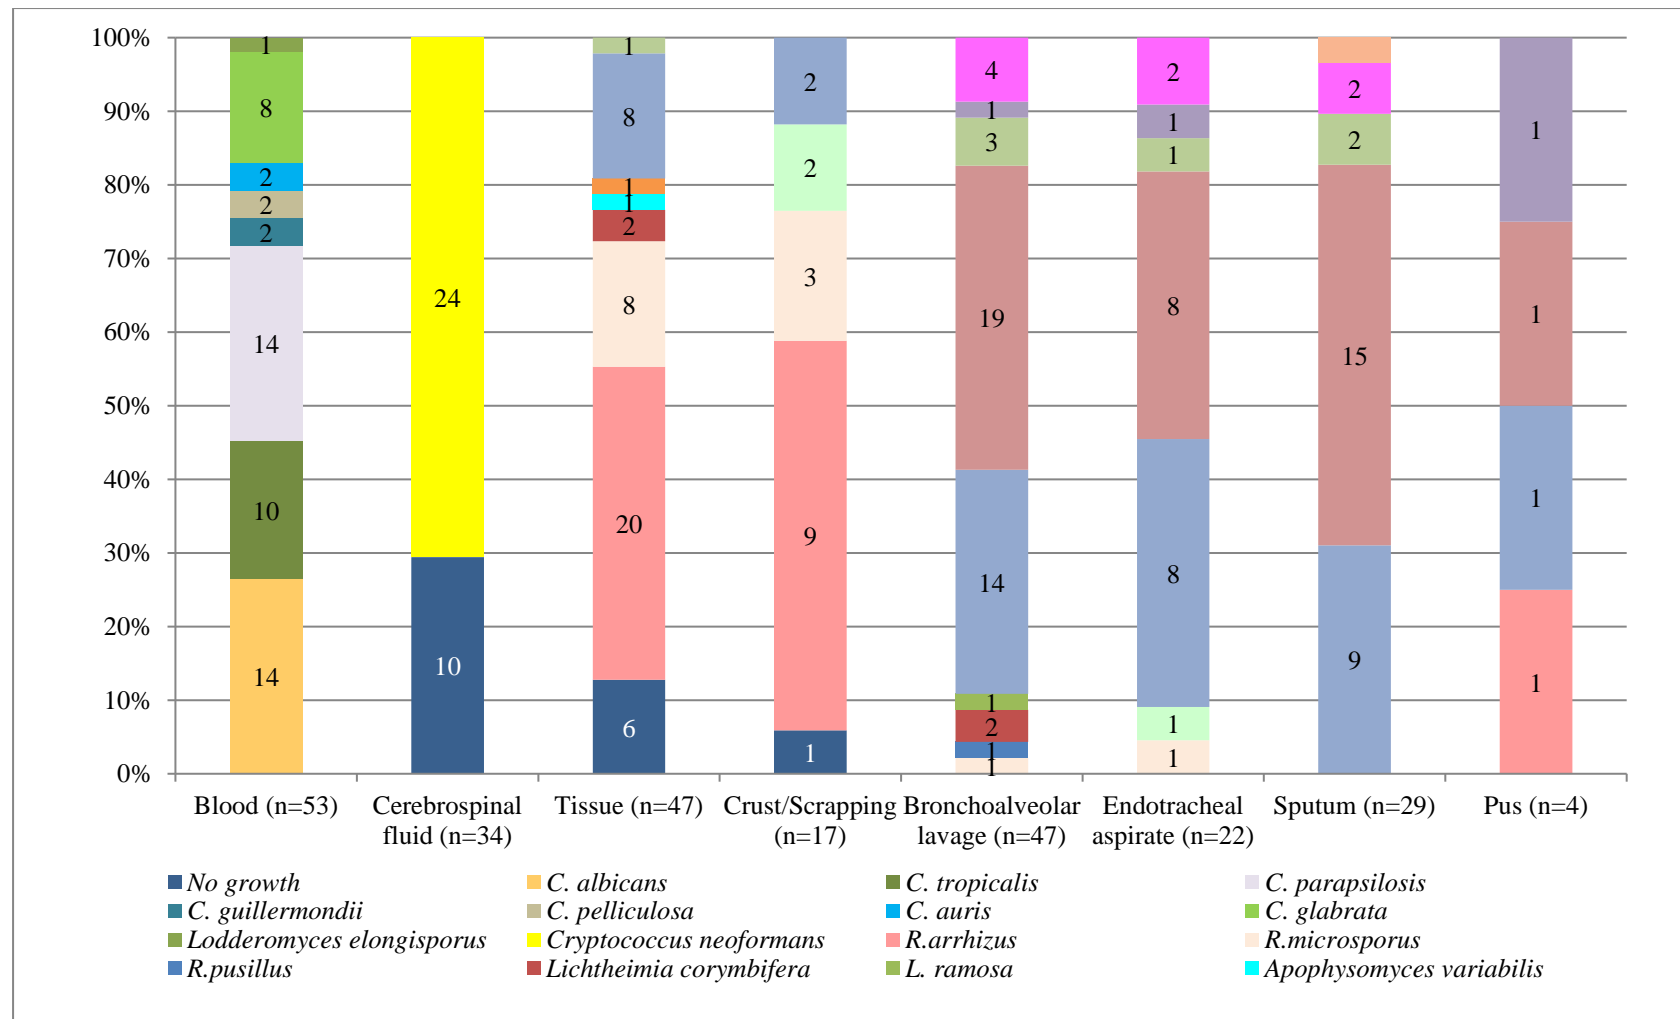

Note: IFI: invasive fungal infections
